# Supplementary material for: The iron group transition-metal (Fe, Ru, Os) coordination of Se-doped graphitic carbon (Se@g-C3N4) nanostructures for the smart therapeutic delivery of zidovudine (ZVD) as an antiretroviral drug: a theoretical calculation perspective
Source: Royal Society of Chemistry journal article supplement (doi:10.1039/d3ra06885d), 2023-01-01
Supplement: d3ra06885d1.pdf [file d3ra06885d1.pdf]

## Supporting Information

| Systems                                 | Frequencies    | Vibrational Assignments    |
|-----------------------------------------|----------------|----------------------------|
| ZVD_Fe_Se@C <sub>3</sub> N <sub>4</sub> | 3787,3776,3769 | Asymmetric NH <sub>2</sub> |
|                                         | 3649,3646      | Asymmetric NH              |
|                                         | 3634,3627,     | Symmetric NH <sub>2</sub>  |
|                                         | 3508           | Symmetric OH               |
|                                         | 3224           | Asymmetric CH <sub>2</sub> |
|                                         | 3174,3152      | Asymmetric CH <sub>3</sub> |
|                                         | 3063           | Symmetric CH <sub>3</sub>  |
| ZVD_Os_Se@C <sub>3</sub> N <sub>4</sub> | 3921           | Symmetric OH               |
|                                         | 3786,3769      | Asymmetric NH <sub>2</sub> |
|                                         | 3656,3648,3644 | Symmetric NH               |
|                                         | 3634           | Symmetric NH <sub>2</sub>  |
|                                         | 3232           | Symmetric CH               |
|                                         | 3176           | Asymmetric CH <sub>2</sub> |

### **Iron group transition-metals (Fe, Ru, Os) coordination of Se-doped graphitic carbon (Se@g-C<sub>3</sub>N<sub>4</sub>) nanostructured for smart therapeutic delivery of Zidovudine (ZVD) as an antiretroviral drug: Perspective from theoretical calculations**

**Favour A. Nelson<sup>a,c</sup>, Hitler Louis<sup>a,c,d\*</sup>, Innocent Benjamin<sup>a,b</sup>, and Timothy Rawlings<sup>a,c</sup>**

<sup>a</sup> Computational and Bio-simulation Research Group, University of Calabar, Calabar, Nigeria

<sup>b</sup> Department of Microbiology, University of Calabar, Calabar Nigeria

<sup>c</sup> Department of Pure and Applied Chemistry, University of Calabar, Calabar Nigeria

<sup>d</sup> Centre for Herbal Pharmacology and Environmental Sustainability, Chettinad Hospital and Research Institute, Chettinad Academy of Research and Education, kelambakkam-603103, Tamil Nadu, India

**\*Corresponding author's email: [louismuzong@gmail.com](mailto:louismuzong@gmail.com)**

|                                             |                 |                            |
|---------------------------------------------|-----------------|----------------------------|
|                                             | 3174,3141       | Asymmetric CH <sub>3</sub> |
|                                             | 3103,3063       | Symmetric CH <sub>2</sub>  |
|                                             | 3054            | Symmetric CH <sub>3</sub>  |
| <b>ZVD_Ru_Se@C<sub>3</sub>N<sub>4</sub></b> | 3938            | Symmetric OH               |
|                                             | 3792,3791,3758, | Asymmetric NH <sub>2</sub> |
|                                             | 3658,3651       | Symmetric NH               |
|                                             | 3627            | Symmetric NH <sub>2</sub>  |
|                                             | 3273            | Symmetric CH               |
|                                             | 3172,3147,      | Asymmetric CH <sub>3</sub> |
|                                             | 3058            | Symmetric CH <sub>3</sub>  |
|                                             | 2283            | Symmetric RuH              |
| <b>ZVD_Se@C<sub>3</sub>N<sub>4</sub></b>    | 3794,3789,3769, | Asymmetric NH <sub>2</sub> |
|                                             | 3652            | Symmetric NH               |
|                                             | 3625            | Symmetric NH <sub>2</sub>  |
|                                             | 3246,3199       | Symmetric CH               |
|                                             | 3169,3148,3058  | Asymmetric CH <sub>3</sub> |

---

**Table S1:** Analysis of the vibrational stability

**Table S2: Analysis of molecular dynamic simulations**

| <b>SURFACES</b>                         |                |              |          |                    | <b>INTERACTIONS</b>                         |                |              |          |                    |
|-----------------------------------------|----------------|--------------|----------|--------------------|---------------------------------------------|----------------|--------------|----------|--------------------|
| <b>Fe_Se@C<sub>3</sub>N<sub>4</sub></b> |                |              |          |                    | <b>ZVD_Fe_Se@C<sub>3</sub>N<sub>4</sub></b> |                |              |          |                    |
| Parameters                              | Initial energy | Final energy | Average  | Standard deviation | Parameters                                  | Initial energy | Final energy | Average  | Standard deviation |
| Tot. energy (kcal/mol)                  | 1512.439       | 1511.881     | 1509.189 | 2.313              | Tot. energy(kcal/mol)                       | 2007.364       | 2013.267     | 2011.286 | 3.652              |
| Pot. energy (kcal/mol)                  | 1465.360       | 874.226      | 866.014  | 52.255             | Pot. energy(kcal/mol)                       | 1930.972       | 1158.973     | 1174.708 | 54.048             |
| Kin. energy (kcal/mol)                  | 47.079         | 637.655      | 643.176  | 51.334             | Kin. energy(kcal/mol)                       | 76.392         | 854.294      | 836.578  | 53.181             |
| Temperature (K)                         | 298.000        | 4036.233     | 4071.177 | 324.932            | Temperature (K)                             | 298.000        | 3332.539     | 3263.428 | 207.456            |
| <b>Os_Se@C<sub>3</sub>N<sub>4</sub></b> |                |              |          |                    | <b>ZVD_Os_Se@C<sub>3</sub>N<sub>4</sub></b> |                |              |          |                    |
| Tot. energy (kcal/mol)                  | 1202.386       | 1198.556     | 1198.509 | 1.472              | Tot. energy(kcal/mol)                       | 1782.040       | 1769.695     | 1769.882 | 1.948              |
| Pot. energy (kcal/mol)                  | 1155.307       | 705.325      | 673.912  | 42.541             | Pot. energy(kcal/mol)                       | 1705.648       | 1013.405     | 976.022  | 50.573             |
| Kin. energy (kcal/mol)                  | 47.079         | 493.231      | 524.597  | 41.811             | Kin. energy(kcal/mol)                       | 76.392         | 756.289      | 793.860  | 49.647             |
| Temperature (K)                         | 298.000        | 3122.054     | 3320.596 | 264.658            | Temperature (K)                             | 298.000        | 2950.229     | 3096.789 | 193.668            |
| <b>Ru_Se@C<sub>3</sub>N<sub>4</sub></b> |                |              |          |                    | <b>ZVD_Ru_Se@C<sub>3</sub>N<sub>4</sub></b> |                |              |          |                    |
| Tot. energy (kcal/mol)                  | 1192.250       | 1195.087     | 1188.994 | 2.004              | Tot. energy(kcal/mol)                       | 1485.699       | 1480.201     | 1479.898 | 1.513              |
| Pot. energy (kcal/mol)                  | 1145.172       | 635.836      | 669.339  | 41.739             | Pot. energy(kcal/mol)                       | 1409.307       | 825.112      | 827.883  | 42.890             |
| Kin. energy (kcal/mol)                  | 47.079         | 559.250      | 519.656  | 41.035             | Kin. energy(kcal/mol)                       | 76.392         | 655.089      | 652.015  | 42.127             |
| Temperature (K)                         | 298.000        | 3539.946     | 3289.319 | 259.746            | Temperature (K)                             | 298.000        | 2555.454     | 2543.461 | 164.334            |
| <b>Se@C<sub>3</sub>N<sub>4</sub></b>    |                |              |          |                    | <b>ZVD_Se@C<sub>3</sub>N<sub>4</sub></b>    |                |              |          |                    |
| Tot. energy (kcal/mol)                  | 1174.597       | 1168.741     | 1169.609 | 1.443              | Tot. energy(kcal/mol)                       | 1590.769       | 1589.190     | 1585.483 | 2.322              |
| Pot. energy (kcal/mol)                  | 1128.406       | 593.919      | 655.530  | 41.357             | Pot. energy(kcal/mol)                       | 1515.265       | 911.966      | 869.428  | 47.621             |
| Kin. energy (kcal/mol)                  | 46.191         | 574.822      | 514.080  | 40.650             | Kin. energy(kcal/mol)                       | 75.504         | 677.224      | 716.055  | 46.752             |
| Temperature (K)                         | 298.000        | 3708.484     | 3316.603 | 262.258            | Temperature (K)                             | 298.000        | 2672.882     | 2826.142 | 184.523            |



**Table S3:** EDA analysis

| Complexes                               | $\Delta E_{\text{tot}}$ (kJ/mol) | $\Delta E_{\text{orb}}$ (kJ/mol) | $\Delta E_{\text{steric}}$ (kJ/mol) |
|-----------------------------------------|----------------------------------|----------------------------------|-------------------------------------|
| ZVD_Fe_Se@C <sub>3</sub> N <sub>4</sub> | -787.7                           | -19691.3                         | 18903.6                             |
| ZVD_Os_Se@C <sub>3</sub> N <sub>4</sub> | -1837.9                          | -5776.1                          | 3938.2                              |
| ZVD_Ru_Se@C <sub>3</sub> N <sub>4</sub> | -787.7                           | -9714.4                          | 8926.7                              |
| ZVD_Se@C <sub>3</sub> N <sub>4</sub>    | -262.6                           | -3150.6                          | 2888                                |

**Table S4:** Analysis of bond dissociation energies

| Complexes                               |      | Energies              | Before interaction | After interaction |
|-----------------------------------------|------|-----------------------|--------------------|-------------------|
| Fe_Se@C <sub>3</sub> N <sub>4</sub>     | ZVD_ | $\Delta H$ (hartrees) | -5777.232549       | -6740.058495      |
|                                         |      | Cv (cal/mol-kelvin)   | 137.377            | 201.400           |
|                                         |      | S (cal/mol-kelvin)    | 214.109            | 276.147           |
| ZVD_Os_Se@C <sub>3</sub> N <sub>4</sub> |      | $\Delta H$ (hartrees) | -4604.340701       | -5567.187842      |
|                                         |      | Cv (cal/mol-kelvin)   | 134.114            | 201.205           |
|                                         |      | S (cal/mol-kelvin)    | 202.932            | 276.115           |
| ZVD_Ru_Se@C <sub>3</sub> N <sub>4</sub> |      | $\Delta H$ (hartrees) | -4608.548304       | -5571.410260      |
|                                         |      | Cv (cal/mol-kelvin)   | 133.227            | 204.169           |
|                                         |      | S (cal/mol-kelvin)    | 201.157            | 289.246           |
| ZVD_Se@C <sub>3</sub> N <sub>4</sub>    |      | $\Delta H$ (hartrees) | -4513.632166       | -5476.471072      |
|                                         |      | Cv (cal/mol-kelvin)   | 129.102            | 196.309           |
|                                         |      | S (cal/mol-kelvin)    | 200.751            | 281.757           |

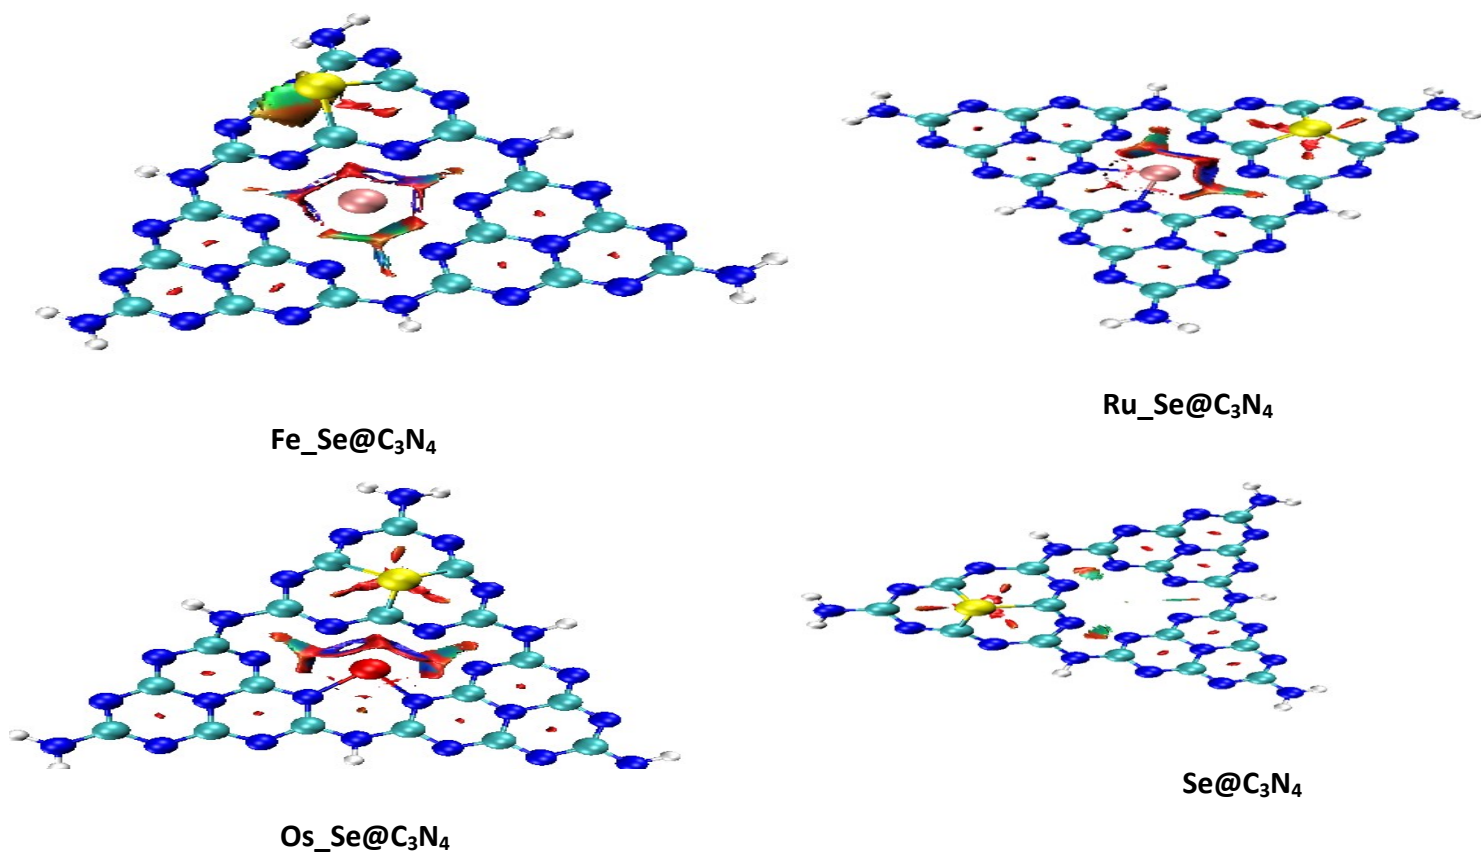

**FIG. S1:** Plots demonstrating the QTAIM of the studied adsorbents

**Table S5:** frequency scaling factors for interactions

| Systems                                 | Frequency scaling factors (cm <sup>-1</sup> ) |
|-----------------------------------------|-----------------------------------------------|
| ZVD_Fe_Se@C <sub>3</sub> N <sub>4</sub> | 1.00                                          |
| ZVD_Os_Se@C <sub>3</sub> N <sub>4</sub> | 1.00                                          |
| ZVD_Ru_Se@C <sub>3</sub> N <sub>4</sub> | 1.00                                          |
| ZVD_Se@C <sub>3</sub> N <sub>4</sub>    | 1.00                                          |

### Fe\_Se@C<sub>3</sub>N<sub>4</sub>

**BCPs: 105**

Eigenvalues of Hessian: 0.8068238083E-01 -0.1240909796E-01 -0.1439806657E-01

**BCPs: 86**

Eigenvalues of Hessian: -0.7658421793E-02 -0.8167437063E-02 0.4870697019E-01

### Os\_Se@C<sub>3</sub>

**BCPs: 85**

Eigenvalues of Hessian: 0.3568443039E-02 0.1193430711E+00 -0.1819774842E-01

**BCPs: 112**

Eigenvalues of Hessian: -0.3179864756E-02 0.1206931094E+00 -0.1821569506E-01

### Ru\_Se@C<sub>3</sub>N<sub>4</sub>

**BCPs: 103**

Eigenvalues of Hessian: 0.2943606577E+00 -0.4926281633E-01 -0.3524488154E-01

**BCPs: 85**

Eigenvalues of Hessian: -0.6811063517E+00 0.7404284668E+00 -0.6078778218E+00

### Se@C<sub>3</sub>N<sub>4</sub>

**BCPs: 95**

Eigenvalues of Hessian: 0.2556798421E+00 -0.1313657293E+00 -0.1218438588E+00

**BCPs: 107**

Eigenvalues of Hessian: 0.1158982737E+00 -0.1599473872E-01 -0.1562365172E-01

**Fig S2: evidence of  $\lambda_1$ ,  $\lambda_2$  and  $\lambda_3$  values from Multiwfn files**

**Table S6: Calculated energy gaps of surfaces and interactions using PBE0 hybrid density functional**

| <b>SYSTEMS</b>                          | <b>ENERGY GAP(eV)</b> |
|-----------------------------------------|-----------------------|
| Fe_Se@C <sub>3</sub> N <sub>4</sub>     | 1.239                 |
| Os_Se@C <sub>3</sub> N <sub>4</sub>     | 1.082                 |
| Ru_Se@C <sub>3</sub> N <sub>4</sub>     | 1.073                 |
| Se@C <sub>3</sub> N <sub>4</sub>        | 1.663                 |
| ZVD_Fe_Se@C <sub>3</sub> N <sub>4</sub> | 0.240                 |
| ZVD_Os_Se@C <sub>3</sub> N <sub>4</sub> | 0.485                 |
| ZVD_Ru_Se@C <sub>3</sub> N <sub>4</sub> | 0.695                 |
| ZVD_Se@C <sub>3</sub> N <sub>4</sub>    | -0.024                |



### ZVD\_Fe\_Se@C<sub>3</sub>N<sub>4</sub>

**BCPs: 114**

Eigenvalues of Hessian: -0.9596185631E-02 -0.1361456106E-01 0.7429645141E-01

**BCPs: 166**

Eigenvalues of Hessian: -0.6975879367E-03 0.3410287131E-02 0.2022223172E-01

### ZVD\_Os\_Se@C<sub>3</sub>

**BCPs: 8**

Eigenvalues of Hessian: -0.3836610501E+06 -0.3836489828E+06 -0.3836547221E+06

**BCPs: 6**

Eigenvalues of Hessian: -0.1704919976E+06 -0.1704929079E+06 -0.1704906517E+06

### ZVD\_Ru\_Se@C<sub>3</sub>

**BCPs: 170**

Eigenvalues of Hessian: -0.2188668519E+00 -0.2077106109E+00 0.6754240322E+00

**BCPs: 210**

Eigenvalues of Hessian: -0.1246828421E+01 0.1055167227E+01 -0.1215626750E+01

### ZVD\_Se@C<sub>3</sub>N<sub>4</sub>

**BCPs: 25**

Eigenvalues of Hessian: -0.5434233795E+01 -0.6036895092E+01 -0.6032582367E+01

**BCPs: 27**

Eigenvalues of Hessian: -0.1701352465E+06 -0.1701359129E+06 -0.1701374020E+06
